# Supplementary figures and images for: Generation of a functional mammary gland from a single stem cell
Source: Springer Nature journal article supplement (doi:10.1038/nature04372), 2006-01-01

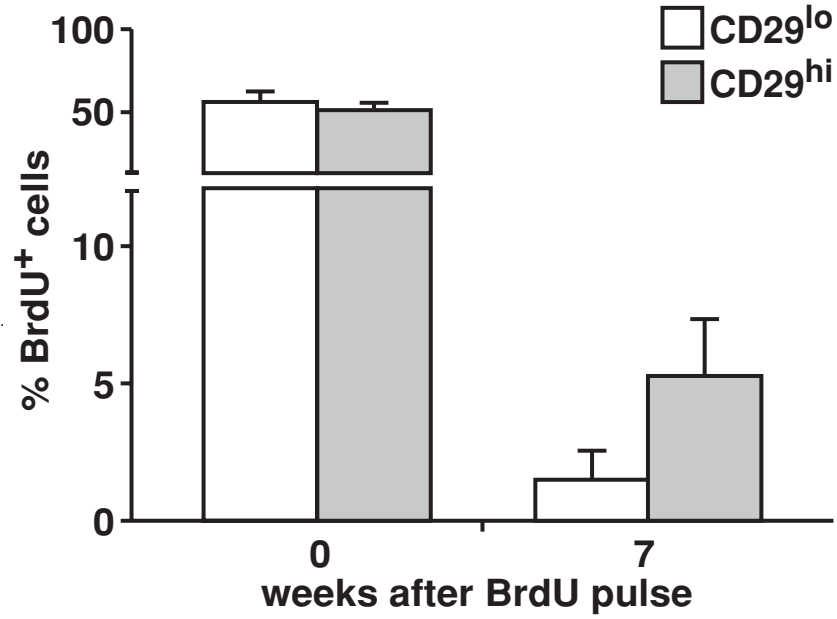

Supplement: 41586_2006_BFnature04372_MOESM3_ESM.pdf [file 41586_2006_BFnature04372_MOESM3_ESM.pdf]

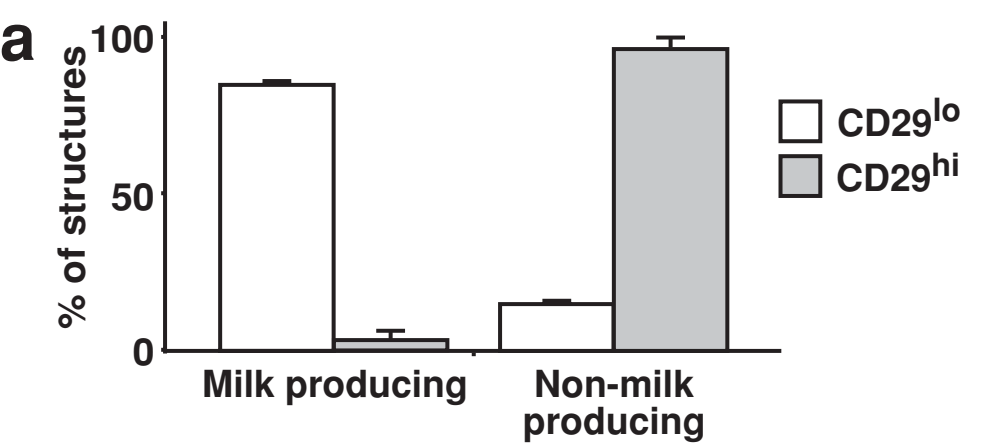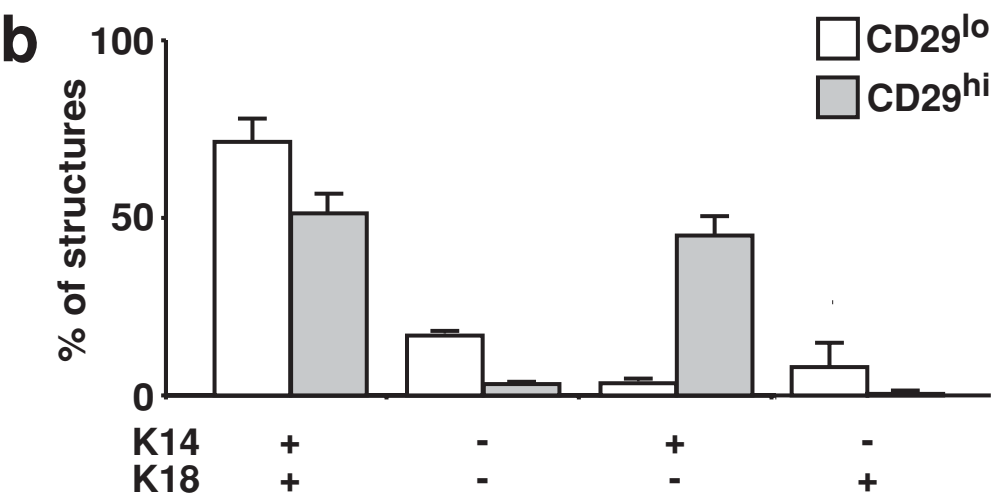

Supplement: 41586_2006_BFnature04372_MOESM4_ESM.pdf [file 41586_2006_BFnature04372_MOESM4_ESM.pdf]

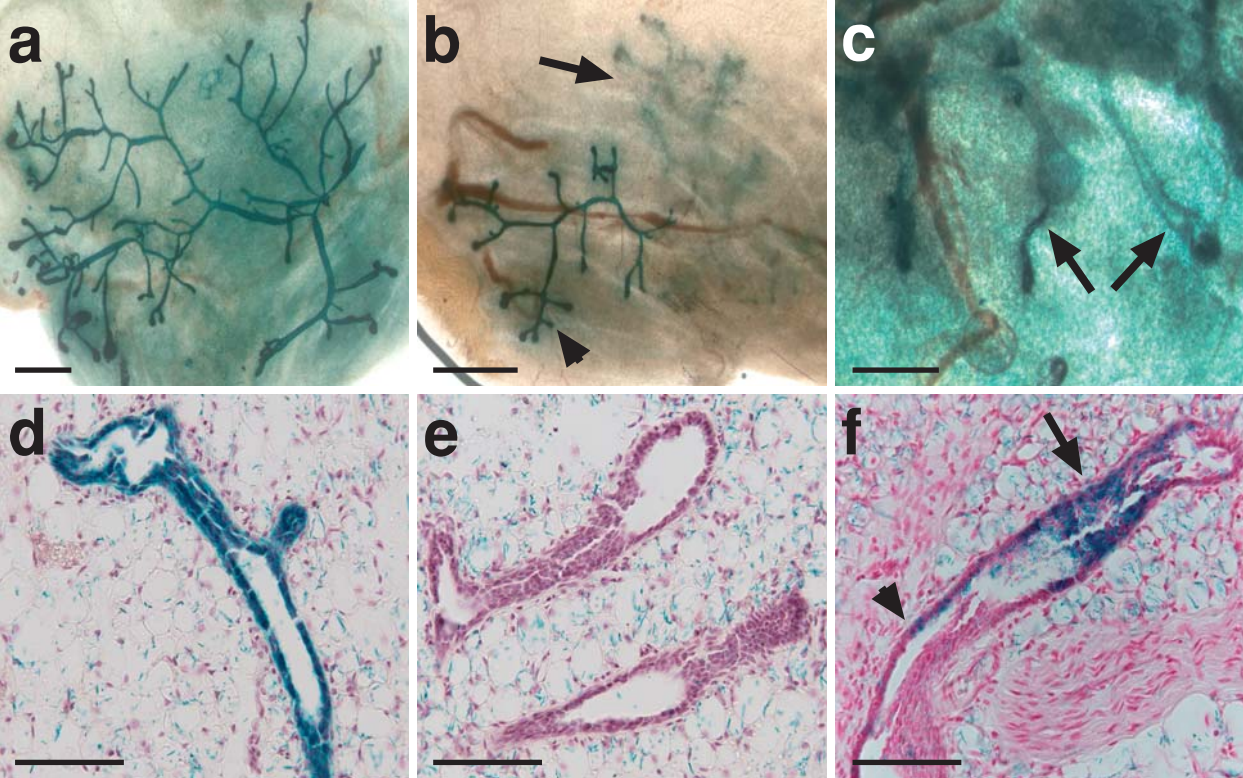

**g**

| Number of outgrowths* | Pure LacZ <sup>+</sup> | Pure wild-type | Chimeric |
|-----------------------|------------------------|----------------|----------|
| 97/112                | 57†                    | 38†            | 2        |

Supplement: 41586_2006_BFnature04372_MOESM5_ESM.pdf [file 41586_2006_BFnature04372_MOESM5_ESM.pdf]
